# Supplementary material
Source: publisher figshare collection journal article supplement (https://gsajournals.figshare.com/ndownloader/files/18536447)
Supplement: Supplementary file 1 [file 18536447]

## Sheet: Supplemental Table S7
Supplemental Table S7. Averages and ranges for best linear unbiased predictors (BLUPs) of flowering time (days to anthesis) in a location (Maricopa, MA; and San Diego, SD) and across all four environments (AllEnv), and estimated heritabilities on a line-mean basis.
		BLUPs					Heritability
Environment	No. lines	Average	Min	Max	S.D.a	C.V.b	Estimate	S.E.c
MA	445	73.96	59.53	85.06	6.1	0.082477	0.89	0.011
SD	451	64.19	51.18	78.6	4.91	0.0764917	0.88	0.01
AllEnv	451	68.97	54.76	83.12	5.65	0.0819197	0.93	0.01
aStandard deviation of the BLUPs
bCoefficient of variation
cStandard error of the heritability
